# Supplementary material for: Identification of Rare Variants in IHH Signaling Pathway-Related Genes Associated with Short Stature
Source: Research Square preprint supplement (doi:10.21203/rs.3.rs-8010983/v1), 2025-12-30
Supplement: Supplementary file 1 [file 3fb13b31886180e947840635.docx]

**Supplemental Table 1. PCR primers for sequencing mutation sites in various genes of the IHH signaling pathway**

| Primer name | Primer sequence (5’-3’) | PCR product size | Purpose |
| --- | --- | --- | --- |
| IHH-1144-F | CAGCTGTCTCTACACACGTG | 443bp | PCR-Sanger sequencing of p.H382Y variant of IHH |
| IHH-1144-R | GTGTTGCCCAGTCAAGTCTC |
| SMO-1643-1798-F | GAGATCAAGAATCGCCCGAG | 842bp | PCR-Sanger sequencing of p.V600M and p.T548I variant of SMO |
| SMO-1643-1798-R | GAATGGGTGTGTGAGCGATG |
| SUFU-1027-F1 | GATCTCAACTCTGCCCACTCC | 714bp | PCR-Sanger sequencing of p.R343C variant of SUFU |
| SUFU-1027-R1 | GTCCCCAGGCTCCTAAACAG |
| GLI1-1528-F2 | CCATCTCTTACCTGCTTAGCCC | 837bp | PCR-Sanger sequencing of p.R510W variant of GLI1 |
| GLI1-1528-R2 | GTTGTGCAGGTTGTGTGCTG |
| GLI1-1965-F | CTTATGCCTGCCCAGCACTAC | 452bp | PCR-Sanger sequencing of p.Q655H variant of GLI1 |
| GLI1-1965-R | CCCAGAGTATCAGTAGGTGGG |
| GLI2-2203-F | CCTCTGAGTCTGAGCCTTCTTG | 574bp | PCR-Sanger sequencing of p.E735K variant of GLI2 |
| GLI2-2203-R | CCTTTGGCTAATCTCACCCCTG |
| GLI2-2345-F1 | GTATGCCCTAGCTACTCCAGAG | 442bp | PCR-Sanger sequencing of p.L782P variant of GLI2 |
| GLI2-2345-R1 | CTGGAGAAGTAGGGGGAGATG |
| GLI4-464-F | CTATCCGCCTCTGCCGTTTC | 615bp | PCR-Sanger sequencing of p.P155H variant of GLI4 |
| GLI4-464-R | CCGCACTTGTAGGGCTTCTC |
| GLI4-980-F | CCTGCGGCAAGAGTTTCAAG | 709bp | PCR-Sanger sequencing of p.D327G variant of GLI4 |
| GLI4-980-R | CGGCTCCCACTTCCAACAATC |
| BOC-1860-F | GGGTCTTAGCTCAAAGCCCAG | 595bp | PCR-Sanger sequencing of p.E620D variant of BOC |
| BOC-1860-R | GATGGCTCTGGATGCTCTTCTG |
| BOC-1439-F | CTCAGCAGGTAAACCAGGAGAC | 658bp | PCR-Sanger sequencing of p.S480L variant of BOC |
| BOC-1439-R | GGGACTAGAAGCCAGTGTGAG |
| GAS1-253-F | CAAGAAGTGGGCAGGACTTG | 742bp | PCR-Sanger sequencing of p.P85S variant of GAS1 |
| GAS1-253-R | GCCAGCATGTCCTCAATGAC |
| GAS1-865-F | CCTACTGCGGCAAAGTCTTC | 573bp | PCR-Sanger sequencing of p.G289S variant of GAS1 |
| GAS1-865-R | CTATCTGTCCCAAGCCACAG |
| CDON-250-F | CTCTCCTCTTTTCTCCCCTG | 465bp | PCR-Sanger sequencing of p.I84V variant of CDON |
| CDON-250-R | CAGCAAGAGTCAAGGCTGAG |
| CDON-3359-F | CTTCCCAGTAGCTAATGGCC | 558bp | PCR-Sanger sequencing of p.C1120Y variant of CDON |
| CDON-3359-R | CTGAGTAGGGACTGGTTCCAC |
| PTCH1-605-F | GCCATACACCTCCCATTAGC | 576bp | PCR-Sanger sequencing of p.K202R variant of PTCH1 |
| PTCH1-605-R | CTCTCTCTGACCAGTGTGTCC |
| PTCH1-2893-F | GACCCAGTGTCATGAAGAGG | 471bp | PCR-Sanger sequencing of p.V965L variant of PTCH1 |
| PTCH1-2893-R | GCTGGTCTTGAACTCCTTGACC |
| PTCH1-3392-F | CCACAGCCCACATTTATGGG | 519bp | PCR-Sanger sequencing of p.P1131L variant of PTCH1 |
| PTCH1-3392-R | GTTCCGAGGGTTGTGAGAAC |
| PTCH2-1126-1289-F | CGGGGTGACTATCAGACACATG | 674bp | PCR-Sanger sequencing of p.H376Y and p.V430A variant of PTCH2 |
| PTCH2-1126-1289-R | CAGGAATACGTCATCCACGC |
| PTCH2-1463-F | CTATCTGCTCATGGTGGGTC | 737bp | PCR-Sanger sequencing of p.Q488L variant of PTCH2 |
| PTCH2-1463-R | CCGTGTCAAAGTGGAGTGAAG |


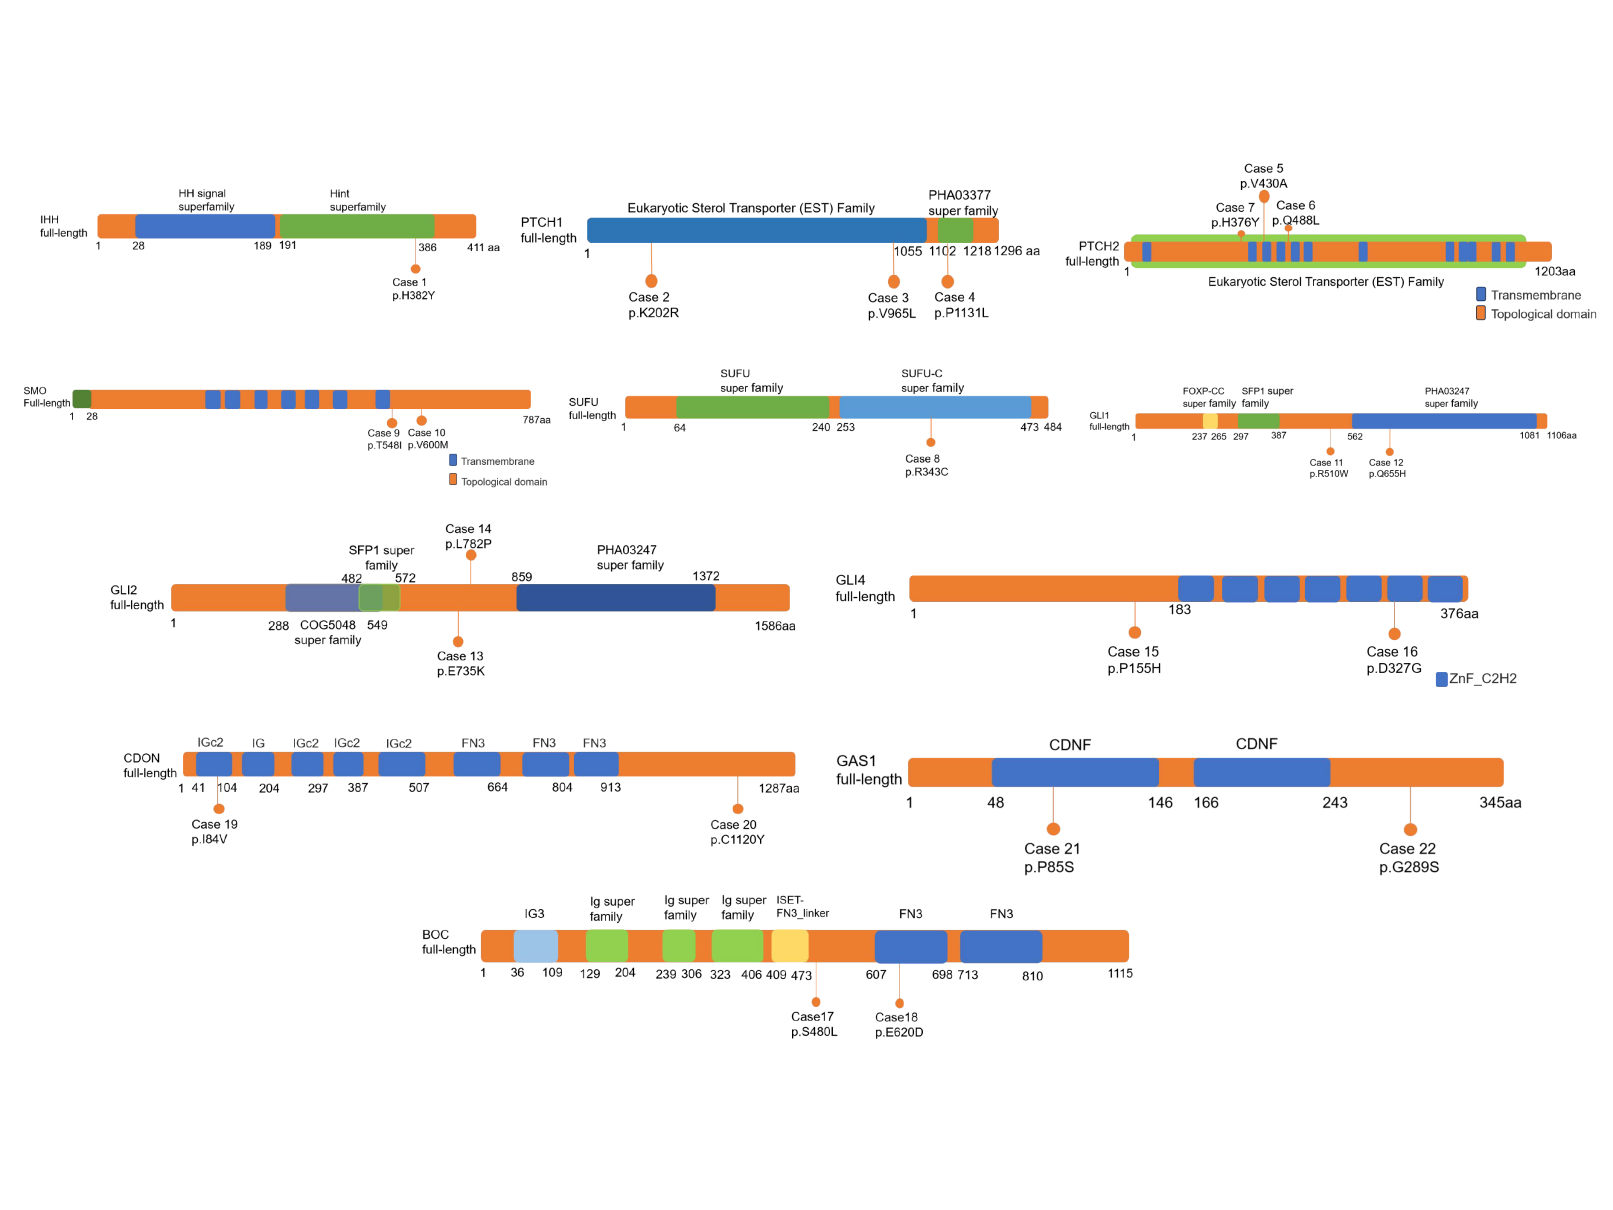


Supplemental Fig. 1


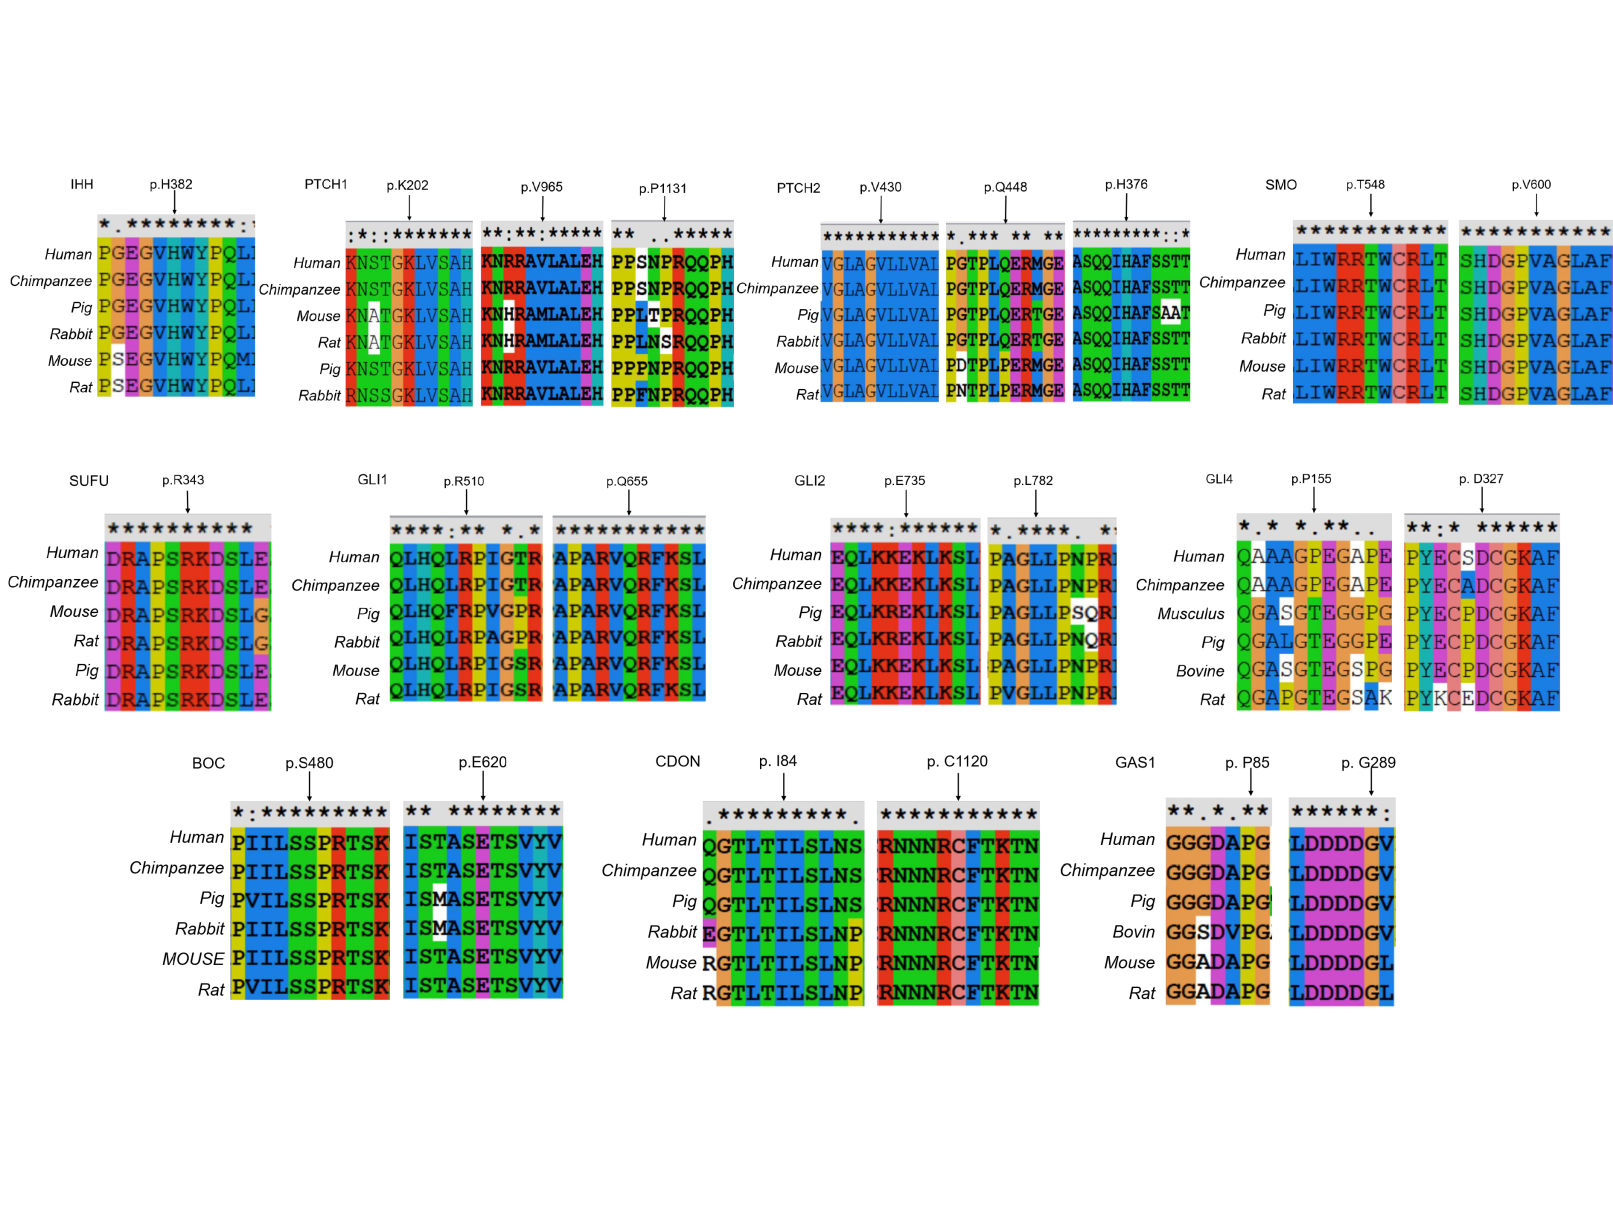


Supplemental Fig. 2
